# Supplementary material for: Patient decision aids: a content analysis based on a decision tree structure
Source: BMC Med Inform Decis Mak. 2019 Jul 19;19:137. doi: 10.1186/s12911-019-0840-x (PMC6642566; doi:10.1186/s12911-019-0840-x)
Supplement: Supplementary file 1 — Top-down and Bottom-up variables (XLSX 29 kb) [file 12911_2019_840_MOESM1_ESM.xlsx]

## Sheet: TABLE4
													Top-down and Bottom-up variables							Top-down and Bottom-up variables								Top-down and Bottom-up variables									Top-down and Bottom-up variables				Top-down and bottom-up variables	Top-down and bottom-up variables	Top-down and bottom-up variables		Top-down and Bottom-up variables			Top-down and Bottom-up variables
Random number	ID_NO	Subject	Title	Updated link	Current as of	Author	Country	Recommended use	Decision Task	Is Free	Price	Interactive	Shared Decision	SD_comment	Advizes DM to share the decision with the patient	Emphasizes the areas where knowledge is incomplete	Represents option outcomes in probable or certain terms	Prob-Cert-Comments	Uses Frequencies	Freq_comments	Uses percentages	Percent_comment	Suggests investigation of the cause of symptoms	Includes personal stories	No. of personal stories	order of stories differs	OrdPS_comment	s1_reported_outcomes	s1_reported_side-effects	s2_reported_outcomes	s2_reported_side-effects	s3_reported_outcomes	s3_reported_sideffects	s4_reported_outcomes	s4_reported_sideeffects	s_reported_strategy	s_reported_constraints	biased_stories	Decision-aid type	Phrasing problems	Missing structure 1	Missing structure2	Comments	Includes significance estimate	Sig_comment	Includes quality assessment of the scientific evidence (GRADE)	Related PDA	RelPdA_comment	Pros and Cons logic
10	1	Alzheimer's Disease	Alzheimer's: Consider options for long-term care. Mayo Clinic	na	42454	Mayo Clinic	USA	Patients and Consumers	Care	yes	0	no	no		no	no	Probable		no		no		na	no	0	na		na	na	na	na	na	na	na	na	na	na	na	question structure	na	no	no	-	na		na	no		-
41	2	Back Pain	Low Back Pain: Should I Try Epidural Steroid Shots? Healthwise	na	42513	Healthwise	USA	Patients and Consumers	Symptoms	yes	0	yes	no		With Doctor and "others"	no	Probable		no		no		no	yes	4	no		successful	no	willingness to try another option	na	willingness to try another option	na	no	no	try anything	yes	yes	knowledge, values, resolution	Question: "I've already tried other treatments - I haven't.." is unclear: have the other treatments worked at all? Not at all? Somewhat? Why did they not work: I did not take them properly, they were ineffective or inappropriate for what I have?	no	no	-	no		no	yes		-
50	3	Breast and Ovarian Cancer	Breast Cancer Risk: Should I Have a BRCA Gene Test? Healthwise	na	42577	Healthwise	USA	Patients and Consumers	Screening	yes	0	yes	no		With Doctor	no	Probable		no		no		na	yes	4	yes	(when browser window has smaller size)	willingness to have test	na	willingness to have test	na	willingness not to try test	na	willingness not to try test	na	na	na	no	knowledge, values, resolution	Question: “Check what you need to do before you make this decision” has no “do nothing option”	There is discussion about false-negative results, but no discussion about false-positive results	Links to other PDAs withold relevant information or make it harder to retrieve: “have surgery to remove ovaries” does not eliminate the risk of having cancer in general → this information is highly relevant for this decision, but you can only find it if you access the next PDA on “Having surgery to remove ovaries”	-	no		no	yes		Information missing: If you do not do the test you do not just avoid the false sense of security given by a negative result, but you also avoid the (false) sense of insecurity given by a positive or a false positive result. This should be in the benefits section for Do not take the test.
63	4	Breast Cancer	Reducing the Risk of Breast Cancer With Medicine: A Guide for Women Agency for Healthcare Research and Quality (AHRQ)	https://ahrqpubs.ahrq.gov/OA_HTML/ibeCCtpItmDspRte.jsp?section=10167&item=46014&sitex=10022:22372:US	40179	Agency for Healthcare Research and Quality	USA	Patients and Consumers	0	no	0.50euro	99	99		99	99	99		99		99		99	99	99	99		99	99	99	99	99	99	99	99	99	99	99	99	99	99	99	99	99		99	99		99
67	5	Breast Cancer	Understanding ductal carcinoma in situ (DCIS) and deciding about treatment. University of Sydney	na	2010	National Breast and Ovarian Cancer Centre	Australia	During consultation	Treatment	yes	0	no	yes		With Doctor	Yes	Probable		yes		yes		na	no	na	na		na	na	na	na	na	na	na	na	na	na	no	knowledge, pros and cons	no	Does not discuss the side effects of radiotherapy or mastectory or lumpectomy. In the case of radiology it states that side effects should be discussed with the doctor. But why? Side effects are a very important attribute of PDM and very much relevant for this treatment decision and should be included	Some information about the blood measures in the eligibility section would be welcome. But since the tools is desinged for use within the patient-doctor interaction this is just a personal comment.	-	no		no	yes		na
91	6	Cholesterol	Cardiovascular Risk Decision Support Tool. HealthDecision	na	2015	Jon Keevil, MD, HealthDecision	USA	During consultation	0	yes	0	yes	no		no	no	Probable		yes		yes		no	no	na	na		na	na	na	na	na	na	na	na	na	na	no	eligibility, risk assessment, decision, documents	"Plant Stanols and Sterols" document: "Consuming 2 grams (2000 mg) of plant sterols or stanols a day can reduce LDL cholesterol by 6 to 15%" -> What does "can reduce" mean in this context? Over how long a period of time? How many people have such a decrease?	The options are presented as dichotomous, but after studying the information documents (presented only when the person rejects the medication!!!) it is clear that there are more options clustered in the Do-not-take-medication option	99	The options are presented as dichotomous, but they are clearly not dichotomous. How is this need to apparently simplify the choice justified? Also, in the data Eligibility section (data entry) it is not explained what "fasting " or "non-fasting" means, since on the blood analyses this is not mentioned. And after how much fasting time should this be mentioned?	no		no	no		no pros and cons section
111	7	Connective Tissue Disorders	Dupuytren's Disease: Should I Have Hand Surgery? Healthwise	na	24.10.2016	Healthwise	USA	Patients and Consumers	Treatment	yes	0	yes	no		no	no	Probable		no		no		no	yes	4	yes	(when browser window has smaller size)	willingness to try something else	no	willingness to try option	no	not right now	no	willingness to try another option	no	na	na	no	knowledge, values, resolution	Question: "I've already tried other treatments - I haven't.." is unclear: have the other treatments worked at all? Not at all? Somewhat? Why did they not work: I did not take them properly, they were ineffective or inappropriate for what I have? Question: “Check what you need to do before you make this decision” has no “do nothing option”	There is no discussion on the risks of collagen injection on the long term	There is no discussion about what causes this condition	The lack of focus on the causes of these conditions or even some statement that the causes are not known is very puzzling.	no		no	no		-
131	8	Elbow Injuries and Disorders	Tennis elbow: Should I have surgery? Healthwise	na	23.05.2016	Healthwise	USA	Patients and Consumers	Treatment	yes	0	yes	no		no	Sometimes	Probable		no		no		no	yes	4	yes	(when browser window has smaller size)	surgery	no	other	no	other	no	other	no	na	na	no	knowledge, values, resolution	99	Missing information on the other options (rehabilitation).	99	It seems as if only one option is actualy presented. If you need more options you have to check out a different tool or information sheet.	no		no	no		-
146	9	Flu (Influenza)	Flu: Should I take antiviral medicine? Healthwise	na	23.05.2016	Healthwise	USA	Patients and Consumers	Treatment	yes	0	yes	no		no	no	Probable		no		no		no	yes	4	yes	(when browser window has smaller size)	willingness to preventive measure	no	willingness to take treatment	no	successful treatment	na	willingness to take treatment	no	na	yes	no	knowledge, values, resolution	There is a spurious conclusion from my point of view: "If you are age 65 or older, should you take antiviral medicine if you get the flu?" and the correct answer is given as: " Yes. Older adults are at higher risk for problems from the flu, such as pneumonia. Antivirals may help prevent these problems" and "Taking an antiviral may be a good idea for people who are at high risk for serious problem…	-	The link to Drug Resistance or Antibiotic Resistance makes no reference to antiviral drugs	-	no		no	no		-
225	10	Osteoarthritis	Knee osteoarthritis: treatment options Option Grid Collaborative	na	2014	OptionGrid	USA	Patients and Consumers	Treatment	yes	0	yes	no		no	no	Probable		yes		yes		no	no	0	na		na	na	na	na	na	na	na	na	na	na	na	test, information, re-test, decision	It is not always clear which "question" they mean or which "this" will reduce the pain I have in my knee	No presentation of the diagnosis and what it means. 2. The option not to take any treatment is not explored.	It would benefit from information about the tests needed to place a diagnosis or info about why the doctor whould recommend some or another treatment	I cannot come back to my answers after sending the feed-back!!! Too interactive for the small amount of information available. Also you don't really intuitively know that you might get more information if you click of the "Show 2%". It is as if the low literacy information is hidden and requires more steps to get to it, when it should be the other way around: you should have low literacy informat…	no		-	-		na
233	11	Osteoporosis	Should I take risedronate (Actonel®) for osteoporosis? Cochrane Musculoskeletal Group	na	2011	Cochrane Musculoskeletal Group	Canada	Doctor Consultation	Treatment	yes	0	no	no	Since the treatment needs to be first offered by the doctor this is only a case of informed decision, not shared decision. Also it is not clear if the other related PDA will be presented together with this one.	no	no	Probable		yes		no		no	no	na	na		na	na	na	na	na	na	na	na	na	na	n	knowledge, values, resolution	"Blocks of 100 faces show a 'best estimate' of what happens to 100 women…" - This shows what may happen to 100 women because not every 100 women will have the same results, but 100 randomly chosen women." The phrase "There is no way of knowing in advance if you will be one of those affected" is biased because it conceals that there is no way of knowing that you will be one of those not affected. …	This is one of 3 PDA that address Osteoporosis. But it seems difficult to evaluate one without the other, especially since they are intended for the same target population (womand at menopause or after, with recently broken bone, a diagnosis of osteoporosis, osteopenia or low bone density who has been offered risedronate by her doctor). However, even if one considers them together, the lack of a …	-	0	yes	(Unclear if results have happened by chance, or if there is no indication of significance). None of the 3 PDA includes significance estimate for Serious Harms. Also, it is difficult to differentiate the impact of each option in terms of quality of literature and significance level.	Yes	yes	There is some inconsistency between the three PDAs: two of them state that the option in each "is commonly offered first" but that "there are other options such as other bisphosphate medications". There is no mention of why one or the other are offered first.	-
238	12	Panic Disorder	Panic disorder: Should I take medicine? Healthwise	na	26.07.2016	Healthwise	USA	Patients and Consumers	Treatment	yes	0	yes	no		no	No	Probable		no		no		no	yes	3	no		therapy	no	medicine	as a risk	medicine	no	99	99	99	no	99	knowledge, values, resolution	-	no	no	-	-		-	-		The don't take medicines (cons) includes both the option to have no treatment and to have counselling treatment which is confusing. Also, there is no consideration for taking both medicines and conselling in the pros and cons list. It is not clear if this is due to the lack of research in this area or to the assumption that using both will bring about both the pros and the cons of both options. H…
242	13	Prediabetes	Prediabetes: Which Treatment Should I Use to Prevent Type 2 Diabetes? Healthwise	na	23.05.2016	Healthwise	USA	Patients and Consumers	Prevention	yes	0	yes	no		no	no	Probable and Certain	not in the presentation of results, but yes in other areas	yes		no		no	yes	3	no		willingness to take medicines	worry about expected side-effects	therapy, no medicines	no	willingness to take antidepressant	no	na	na	na	na	no	knowledge, values, resolution	"For many people, making major lifestyle changes works better than taking metformin to help delay or prevent type 2 diabetes, for up to 10 years. A follow-up study at 15 years showed that making major lifestyle changes was about equal to taking metformin in helping to delay or prevent type 2 diabetes." This phrasing omits to point out that the 28 - 14 =14 new cases that develop type 2 diabetes in…	There are no studies for taking only metformin (medication). There are results presented only for Major lifestyle changes, metformin and lifstyle changes, placebo and lifestyle changes. 2) " Many people age 60 and older benefit more from making major lifestyle changes. And many people younger than 60 benefit more from taking metformin." This is so vague that even I do not understand what it means…	Information about what happens if you do not take medicine and do not make likfestyle changes is missing. There are some hints about this in the section on "Why should you avoid type 2 diabetes", but they are presented in a way that is not comparable to the treatment options. How many people get eye problems, nerve and kidney problems and after how long does death occur?	There is an unexplained difference between "enacting major lifestyle changes" and "information about lifestyle changes for type 2 diabetes" in the "What do numbers tell us about treatments to prevent type 2 diabetes?" section.	no		not everywhere	no		Why pros and cons different from "facts"?
262	14	Prostate Cancer	Prostate cancer: Should I choose active surveillance? Healthwise	na	42577	Healthwise USA	0	Patients and Consumers	Treatment	yes	0	yes	no		no	yes	Probable		no		no		no	yes	4	no		active surveillance	no	surgery and radiation	yes	active surveillance	yes (from other source)	surgery and radiation	no	yes	no	no	knowledge, values, resolution	-	Do nothing	Watchful waiting	The 4 options should be evaluated by the size of the cancer, patient's age, likelihood of growth (PSA and Gleason score) and Observed rate of growth.	no		not everywhere	yes	(should I have radiation or surgery for localized prostate cancer)	-
264	15	Prostate Cancer	Prostate specific antigen (PSA) test: yes or no? Option Grid Collaborative	na	42632	OptionGrid Collaborative	UK, USA	Patients and Consumers	Screening	yes	0	yes	no		no	no	Probable		yes		yes		na	no	na	na		na	na	na	na	na	na	na	na	na	na	na	test, information, re-test, decision	This PDA discusses both biopsies and treatment for prostate cancer. But it is hard to spot the change of topic	no	no	0	no		no	no		-
269	16	Prostate Diseases	Enlarged Prostate: Should I Take Medicine? Healthwise	na	42535	Healthwise	USA	Patients and Consumers	Treatment	yes	0	yes	no		no	no	Probable		yes	(not everywhere is needed)	yes	(not everywhere is needed)	no	yes	4	no		medicine	no	self-management	no	self-management then medicine	no	medicine then self-management	yes	no	no	no	knowledge, values, resolution	" But scientific studies don't show that saw palmetto helps with urinary problems or that beta-sitosterol is safe or helps over the long term." This seems rather strangely phrased: what do the scientific studies show would be more useful	no	no	-	-		-	-		On may conclude that if you take medicine you do not need to make sure to drink enough fluids? For the option not to take medicines there are frequencies given for outcomes, but for the option taking the medicines there are not
291	17	Sore throat	Sore throat: antibiotics or not? Option Grid Collaborative	under revision	41834	OptionGrid Collaborative	UK, USA	Patients and Consumers	Treatment	yes	0	yes	no		no	no	Probable		yes		yes		yes	no	na	na		na	na	na	na	na	na	na	na	na	na	na	test, information, re-test, decision	"What does this treatment consist of? Taking antibiotics, as well as taking over-the counter pain relievers, drinking fluids, eating ice cubes or other cold foods." This is quite strange, such as: "Taking over-the-counter pain relievers, drinking fluids, eating ice cubes or other cold foods."	The treatment depends on the cause of the symptom. Therefore, a useful dm structure would provide advice on how to see what caused the sore throat and the recommend treatment. There is no mention that it is not possible to know what cause the sore throat or that it is too expensive, so it is not clear why the information is not presented in this way	-	-	no		no	no		-
316	18	Toilet Training	Bed-wetting: Should I do something about my child's bed-wetting? Healthwise	na	42577	Healthwise	USA	Patients and Consumers	Treatment	yes	0	yes	no		yes	no	Mostly certain		yes		no		yes	yes	3	no		self-management	na	self-management	na	medicine	no	na	na	yes	yes	no	knowledge, values, resolution	-	no	no	-	-		-	-		-
318	19	Testicular cancer	Testicular Cancer: Which Treatment Should I Have for Stage I Nonseminoma Testicular Cancer After My Surgery? Healthwise	na	42577	Healthwise	USA	Patients and Consumers	Treatment	yes	0	yes	no		no	no	Probable		yes		no		no	yes	4	no		lymph node surgery	yes	chemotherapy	yes	surveillance	na	surveillance, cancer returned => willingness to try chemotherapy	no	yes	no	no	knowledge, values, resolution	The value scales are very badly phrased: "I want chemo or lymph node surgery for the best chance of cure at the start. (Not important… Somewhat important, very important?; "I might not need more treatment, so I want surveillance.( same scale a.p); " I'd rather have side effects from treatment than have surveillance. (same scale); "I can make sure I go to checkups and tests during surveillance. (s…	no	no	0	no		no	no		"Chemotherapy can cause serious long-term health problems, including secondary cancers. These cancers may not appear until many years after treatment." If the treatment "causes" the same illness to appear later, is this a treatment?
337	20	Care	When you need extra care, should you receive it at home or in a facility?	na	2010	Ottawa Hospital	Canada	Patients and Consumers	Care	yes	0	no	yes		yes	no	na		na		na		na	na	na	na		na	na	na	na	na	na	na	na	na	na	na	knowledge, values, resolution	-	The information on the types of palliative care seem overly simplified and sometimes inaccurate (homemaking, nursing and personal support is not available 24 hours a day in health facility; cleaning ladies do not work during the night for example);	there is no option of assisted living	-	na		na	na		na
[truncated: 40 more columns]
